# Supplementary material for: Molecular phylogeny of Triatomini (Hemiptera: Reduviidae: Triatominae)
Source: PubMed Central journal article supplement (PMC4021723; doi:10.1186/1756-3305-7-149), 2014-03-31

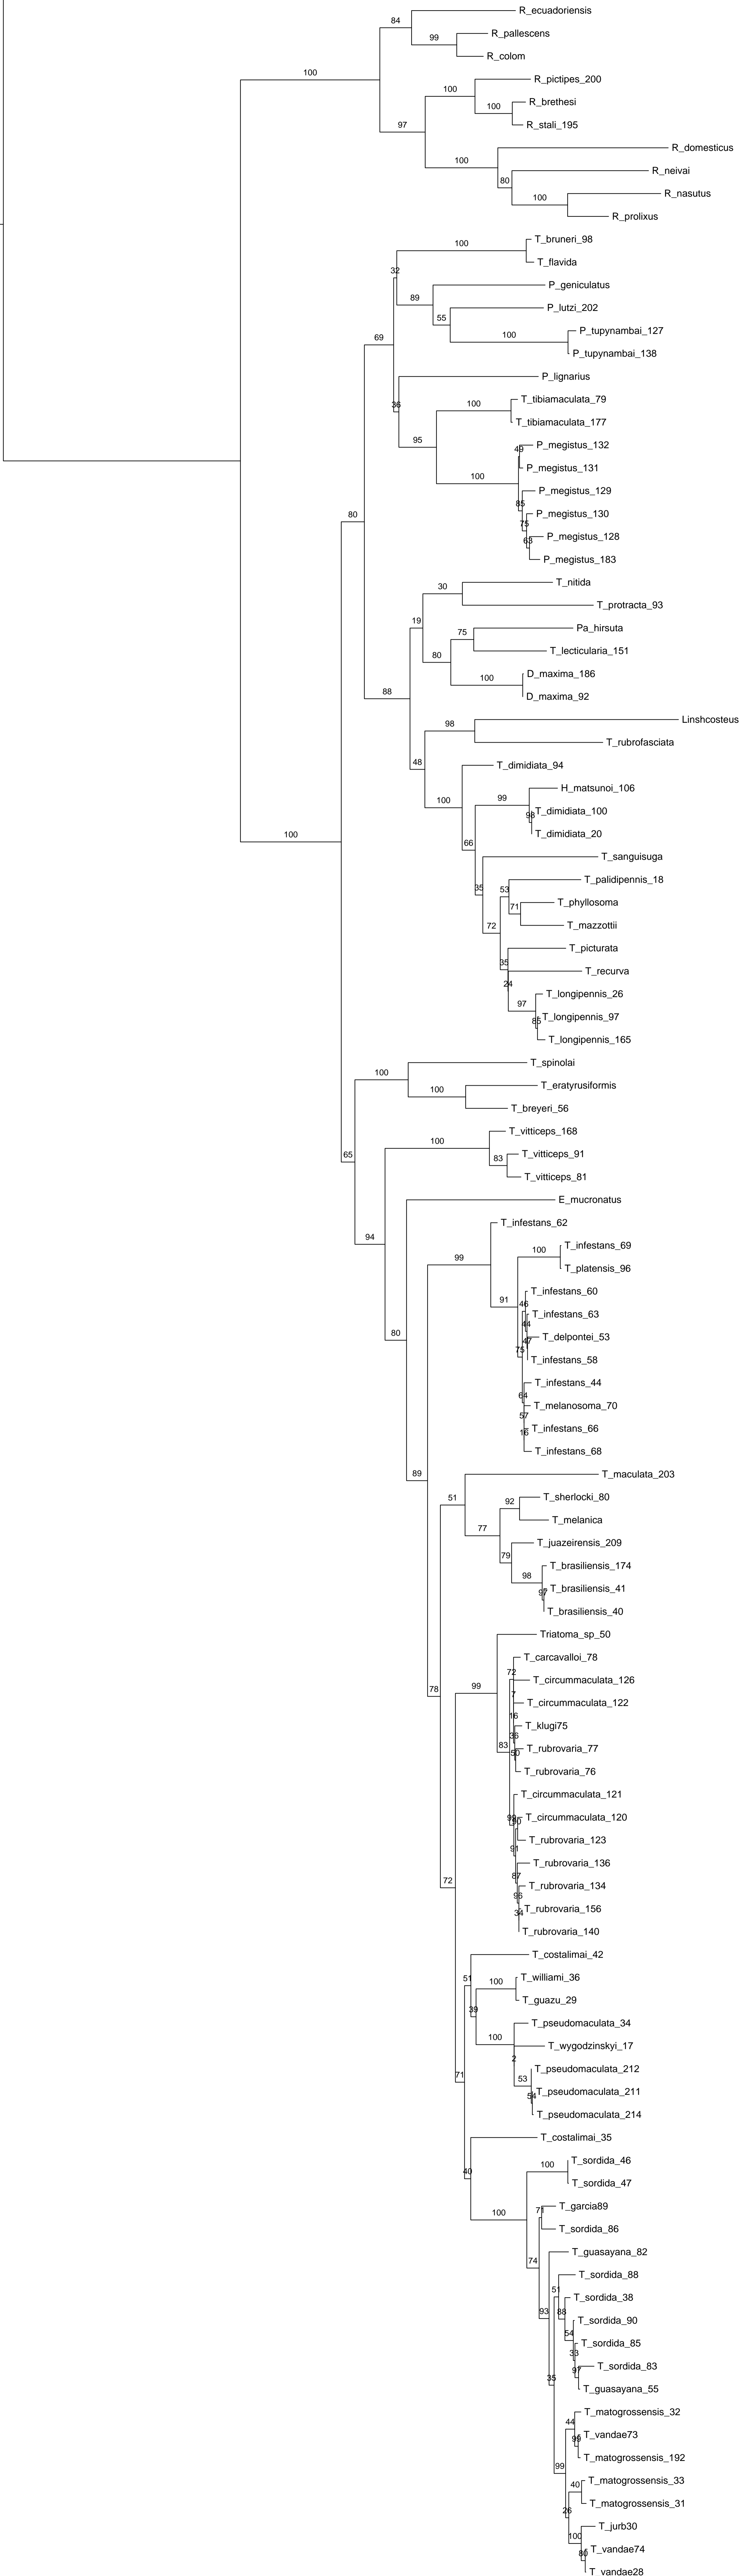

Supplement: 1756-3305-7-149-S2.pdf [file 1756-3305-7-149-S2.pdf]
